# Supplementary material for: Circularly Polarized Luminescence from New Heteroleptic Eu(III) and Tb(III) Complexes
Source: PubMed Central journal article supplement (PMC10265700; doi:10.1021/acs.inorgchem.3c00196), 2023-06-01
Supplement: ic3c00196_si_001.pdf [file ic3c00196_si_001.pdf]

# Supporting information

## **Circularly Polarized Luminescence from new heteroleptic Eu(III) and Tb(III) complexes**

Silvia Ruggieri,<sup>1</sup> Silvia Mizzoni,<sup>1</sup> Chiara Nardon,<sup>1</sup> Enrico Cavalli,<sup>2</sup> Cristina Sissa,<sup>2</sup> Michele Anselmi,<sup>3</sup> Pier Giorgio Cozzi,<sup>3,4</sup> Andrea Gualandi,<sup>3,4</sup> Martina Sanadar,<sup>5</sup> Andrea Melchior,<sup>5\*</sup> Francesco Zinna,<sup>6</sup> Oliver G. Willis,<sup>6</sup> Lorenzo Di Bari,<sup>6\*</sup> Fabio Piccinelli<sup>1\*</sup>

<sup>1</sup> Luminescent Materials Laboratory, DB, University of Verona, and INSTM, UdR Verona, Strada Le Grazie 15, 37134 Verona, Italy

<sup>2</sup> Department of Chemistry, Life Sciences and Environmental Sustainability, Parma University Parco Area delle Scienze, 17/a – 43124, Parma, Italy

<sup>3</sup> Department of Chemistry “G. Ciamician”, University of Bologna, via Selmi 2 – 40126, Bologna, Italy

<sup>4</sup> Center for Chemical Catalysis - C3, Alma Mater Studiorum - Università di Bologna, Via Selmi 2, 40126 Bologna, Italy

<sup>5</sup> Dipartimento Politecnico di Ingegneria e Architettura, Laboratorio di Tecnologie Chimiche, Università di Udine, via Cotonificio 108, 33100 Udine, Italy

<sup>6</sup> Department of Chemistry and Industrial Chemistry, University of Pisa, via Moruzzi 13, 56124 Pisa, Italy

\*corresponding authors' email address: [fabio.piccinelli@univr.it](mailto:fabio.piccinelli@univr.it), [lorenzo.dibari@unipi.it](mailto:lorenzo.dibari@unipi.it) and [andrea.melchior@uniud.it](mailto:andrea.melchior@uniud.it)

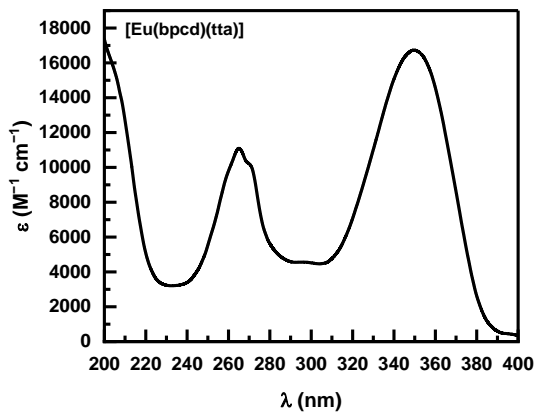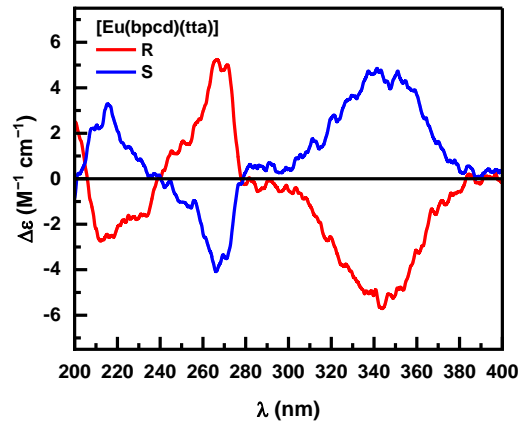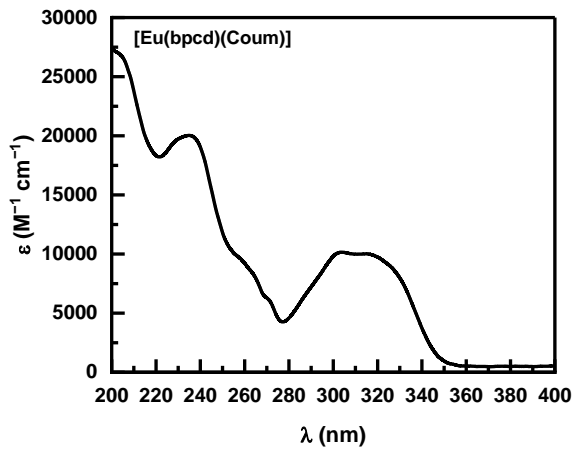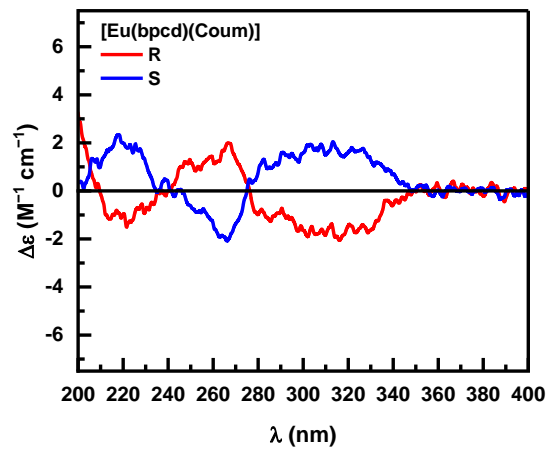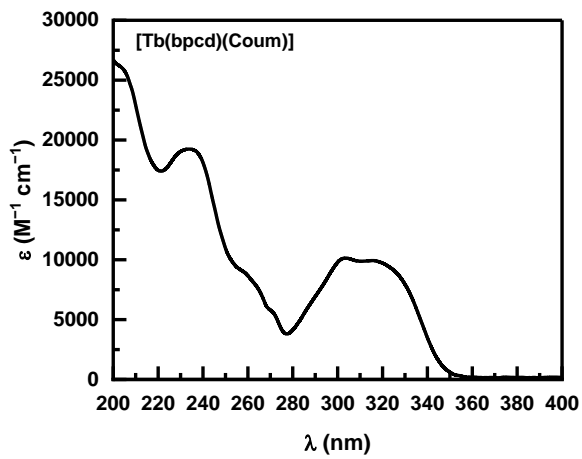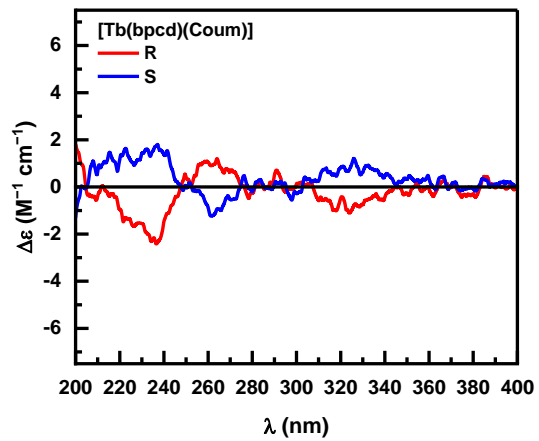

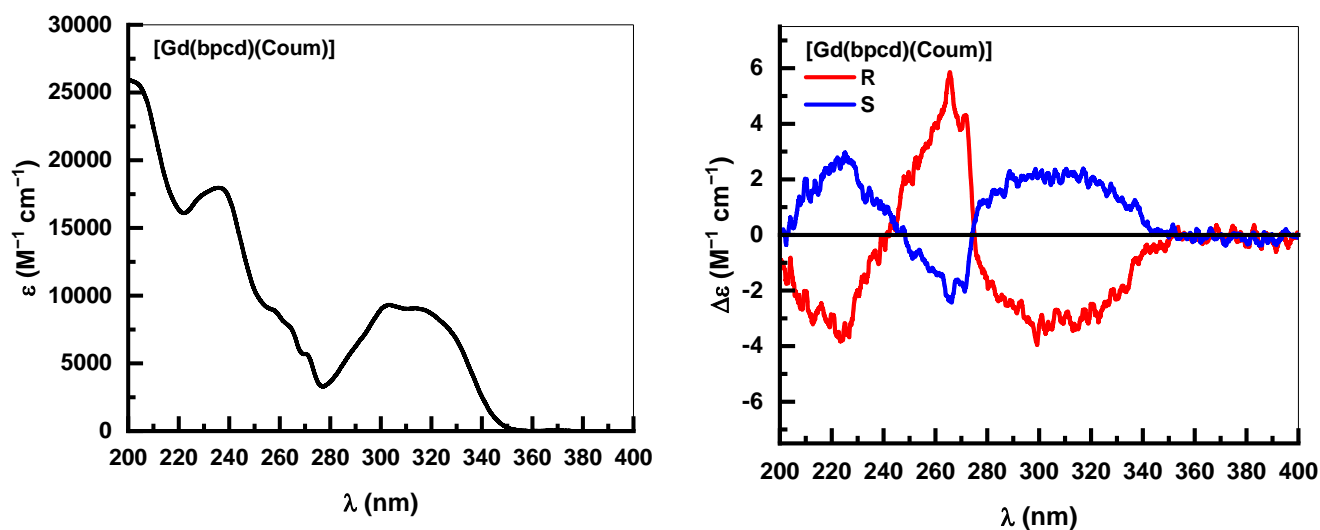

**Figure S1.** Absorbance of both the enantiomers reported as the average of their molar extinction coefficients ( $\epsilon$ ) (left) and ECD (right) spectra of [Eu(bpcd)](tta) (row 1), [Eu(bpcd)(Coum)] (row 2), [Tb(bpcd)(Coum)] (row 3) and [Gd(bpcd)(Coum)] (row 4). The spectrum of the *R,R* enantiomer is reported in red while the spectrum of the *S,S* enantiomer is reported in blue.. The concentration of all the enantiomers is 1 mM and the spectra were measured with 0.01 cm path length.

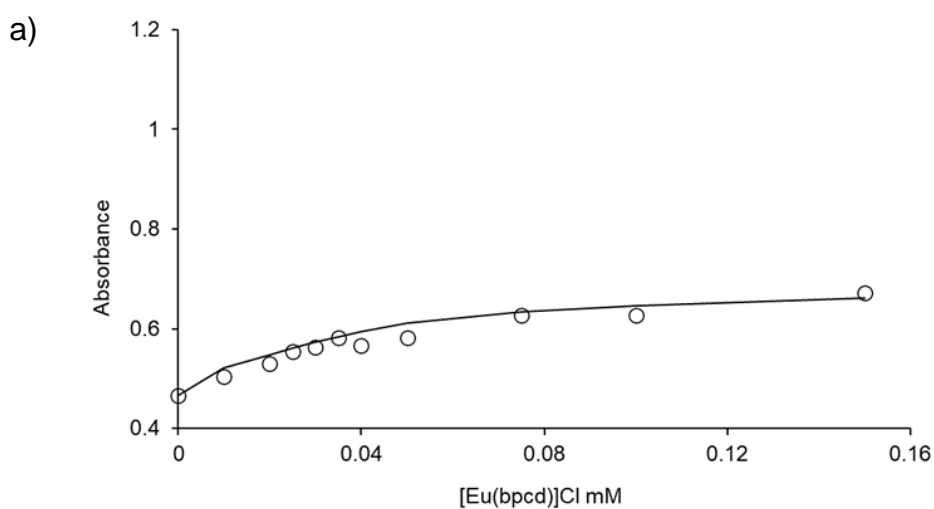

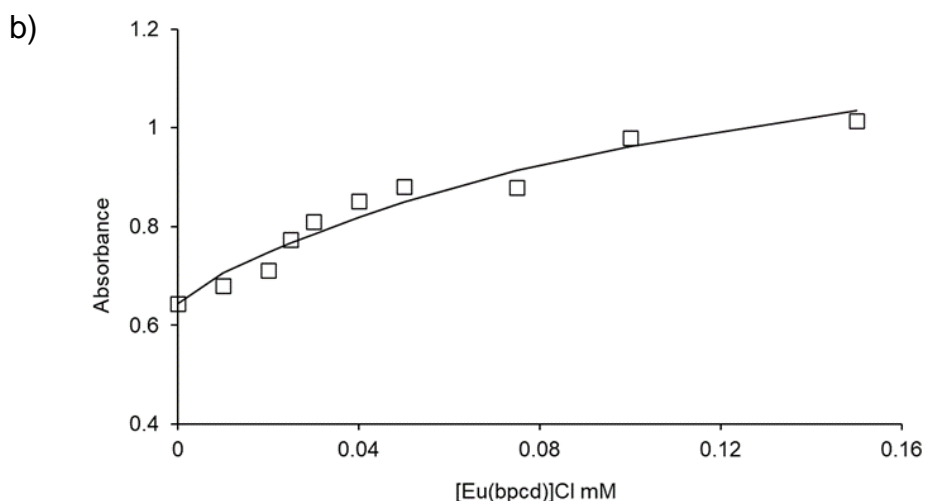

**Figure S2.** Experimental absorbance data (symbols) and fitting isotherm obtained by least squares-treatment in Hypspec for the spectra recorded upon addition of [Eu(bpcd)]Cl to 50  $\mu$ M solutions of a) Coum ( $\lambda = 317$  nm) and b) tta ( $\lambda = 347$  nm).

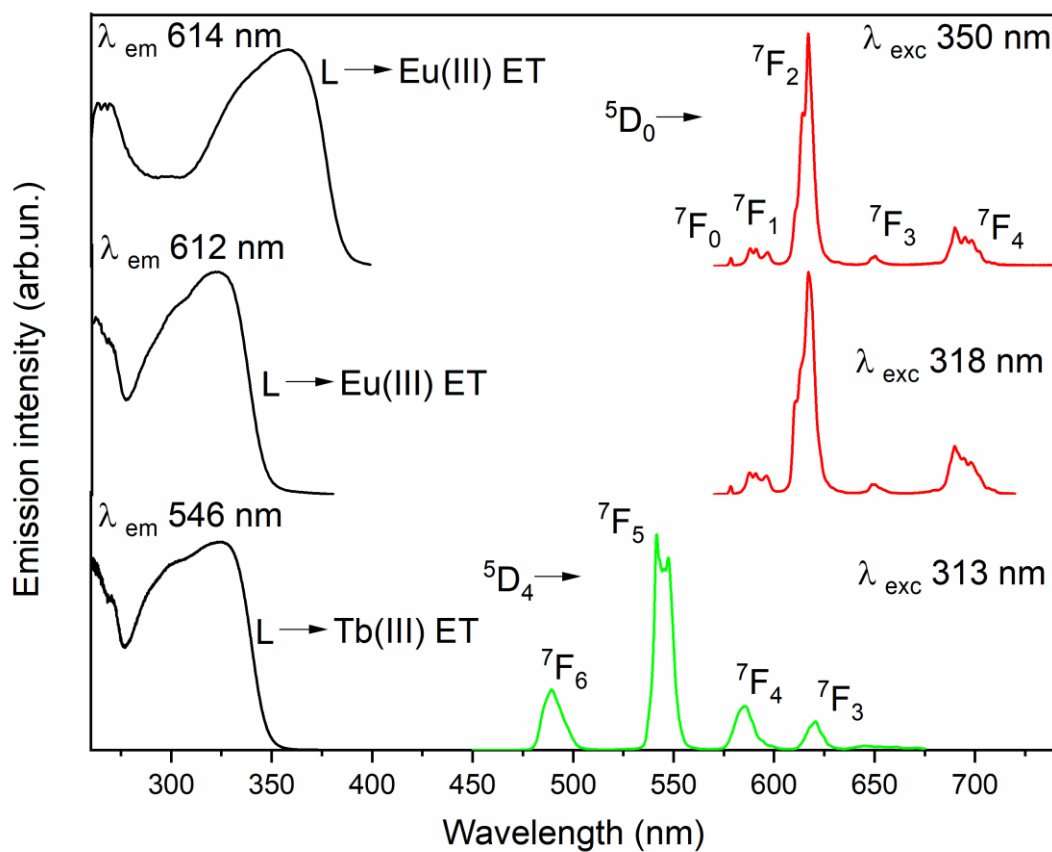

**Figure S3.** Luminescence excitation (left) and emission (right) spectra of (*S,S*)-[Eu(bpcd)(tta)] (top); (*S,S*)-[Eu(bpcd)(Coum)] (middle) and (*S,S*)-[Tb(bpcd)(Coum)] (bottom) complexes dissolved in methanol (50  $\mu$ M). The spectra of the *R,R* enantiomer are not reported as they are perfectly comparable to those of the *S,S* counterpart.

### *Chiroptical instrumentation*

#### CPL measurements

Discrimination of left/right circular polarized states was performed by a photoelastic modulator from a decommissioned Jasco J500C spectropolarimeter operating at 50 KHz coupled with an uncoated Glenn-Thompson polarizer. A Jasco CT-10 was used as the emission monochromator and the detection was performed by a Hamamatsu R376 PMT. The spectra were collected under either 365 or 254 nm irradiation from commercial LED-sources, using a 90° geometry between the excitation and detection direction. All CPL spectra were recorded in 1 cm semi-micro (aperture 4 mm) optical glass cells using the following parameters: scan-speed 0.5 nm/sec, integration time 2 sec, photomultiplier tube driving voltage 600 V, accumulations 4.

#### UV-Vis/ECD measurements

UV-Vis spectra were recorded using a Jasco-V650 spectrophotometer in the spectral range of 200 to 400 nm. All samples were measured in 1 mM MeOH solutions at room temperature. The same solutions were used to record CD spectra using a J1500 spectropolarimeter in 0.01 cm optical glass cells.

#### $B_{\text{CPL}}$

Given the complex structure of CPL spectra with several opposite bands within the same manifold, a more general definition of  $B_{\text{CPL}}$  factor was employed:

$$B_{\text{CPL}} = \varepsilon \cdot \varphi \cdot \frac{1}{2} \frac{\int_{\lambda_a}^{\lambda_b} I(\lambda)g(\lambda)d\lambda}{\int_{\lambda_i}^{\lambda_f} I(\lambda)d\lambda}$$

Where the integral in the numerator has to be estimated between the extrema of the considered transition ( $\lambda_a$ ,  $\lambda_b$ ), while the integral in the denominator is calculated over the whole emission range ( $\lambda_i$ ,  $\lambda_f$ ). Note that if  $g(\lambda)$  does not change sign within a term-to-term transition and it is approximately constant ( $g(\lambda) \approx \bar{g}$ ), then the above definition is reduced to:

$$B_{\text{CPL}} = \varepsilon \cdot \varphi \cdot \frac{1}{2} \bar{g} \cdot \frac{\int_{\lambda_a}^{\lambda_b} I(\lambda) d\lambda}{\int_{\lambda_i}^{\lambda_f} I(\lambda) d\lambda} = \varepsilon \cdot \varphi \cdot \frac{1}{2} \bar{g} \cdot \beta$$

According to the usual definition applicable to lanthanide CPL.<sup>S1</sup>

Additional chiroptical spectra

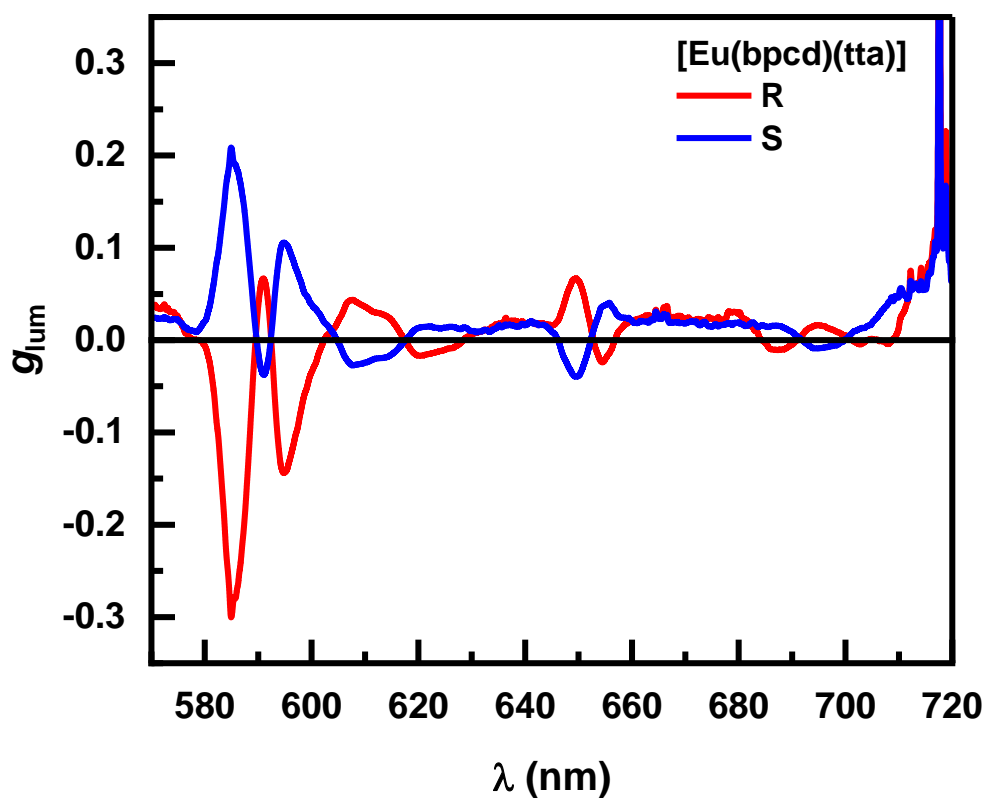

**Figure S4.** The  $g_{\text{lum}}$ -vs-wavelength plot for each enantiomer of [Eu(bpcd)(tta)].

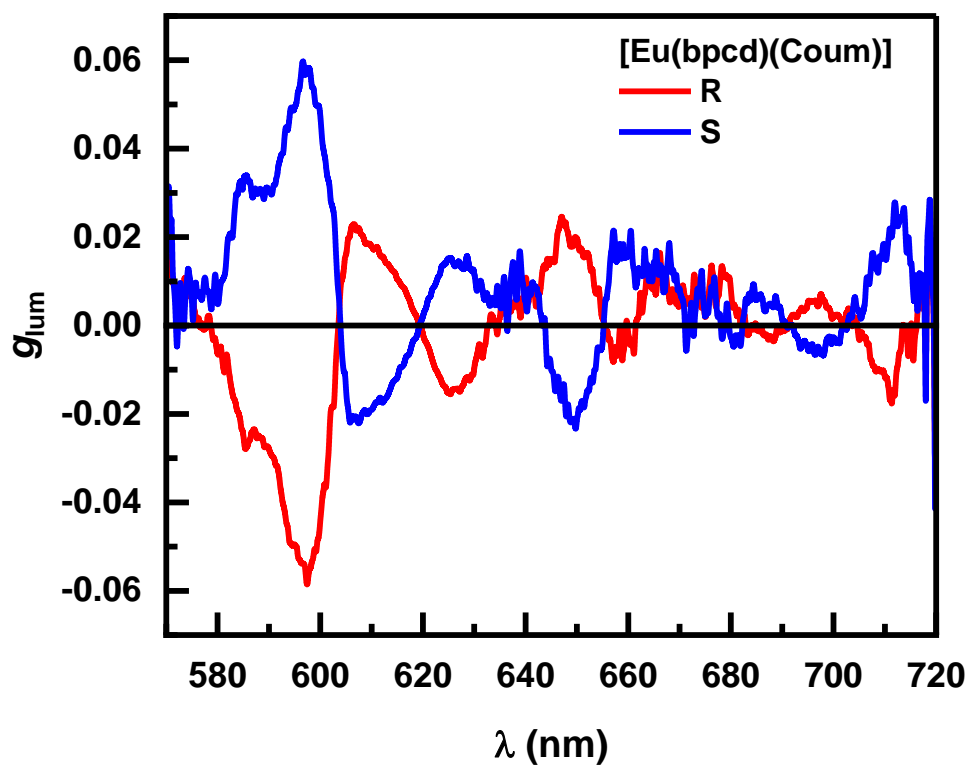

**Figure S5.** The  $g_{lum}$ -vs-wavelength plot for each enantiomer of [Eu(bpcd)(Coum)].

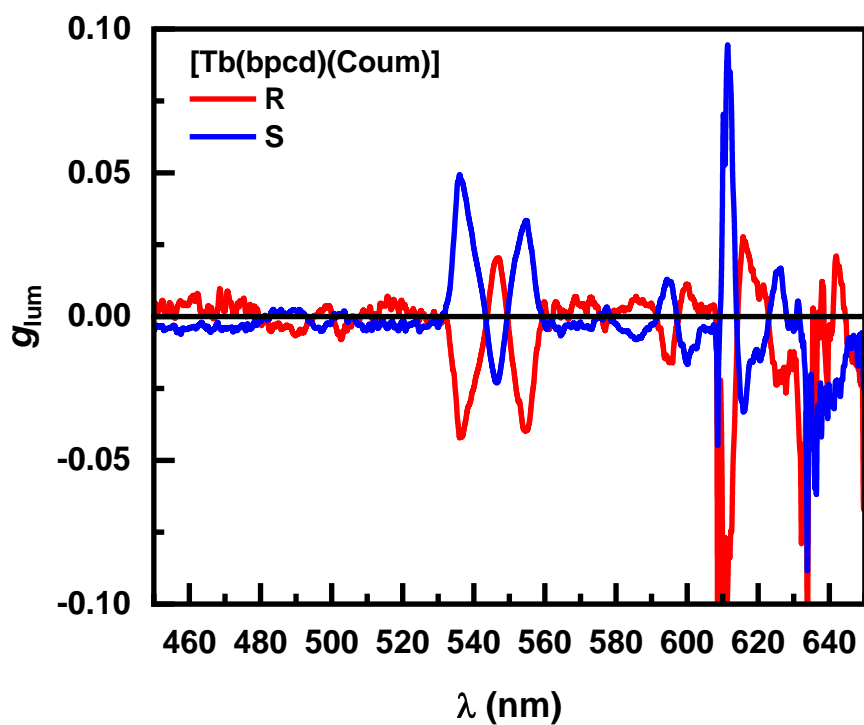

**Figure S6.** The  $g_{lum}$ -vs-wavelength plot for each enantiomer of [Tb(bpcd)(Coum)].

**Figure S7.** Kohn–Sham molecular orbitals composition of  $S_1$  and  $T_1$  states for  $[Y(\text{bpcd})(\text{Coum})]$ . Hydrogen atoms are omitted for clarity.

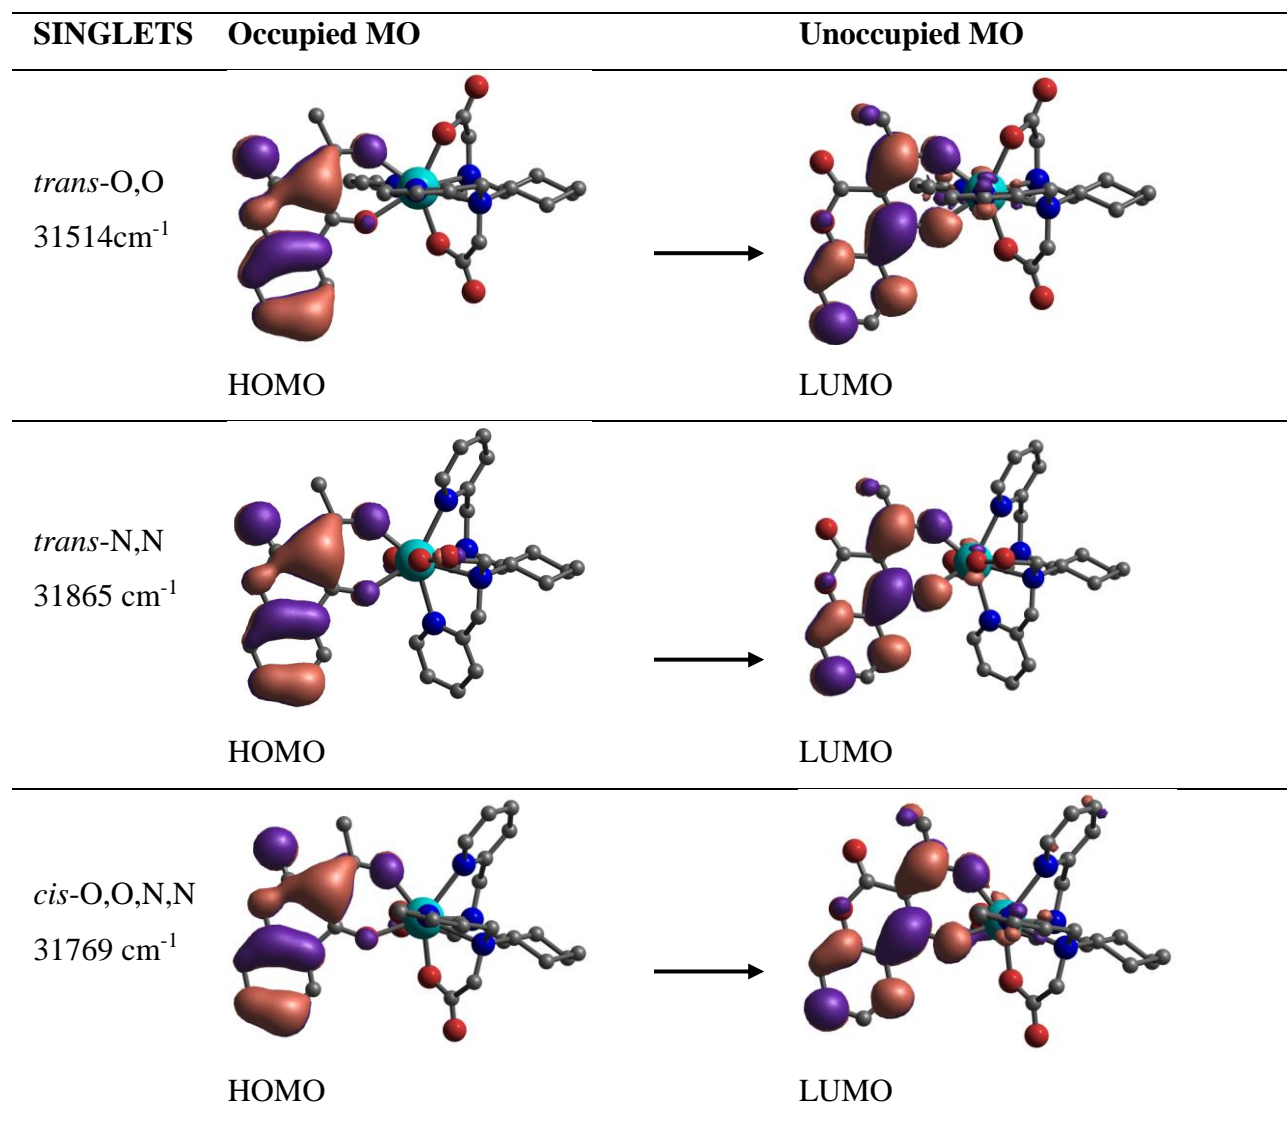



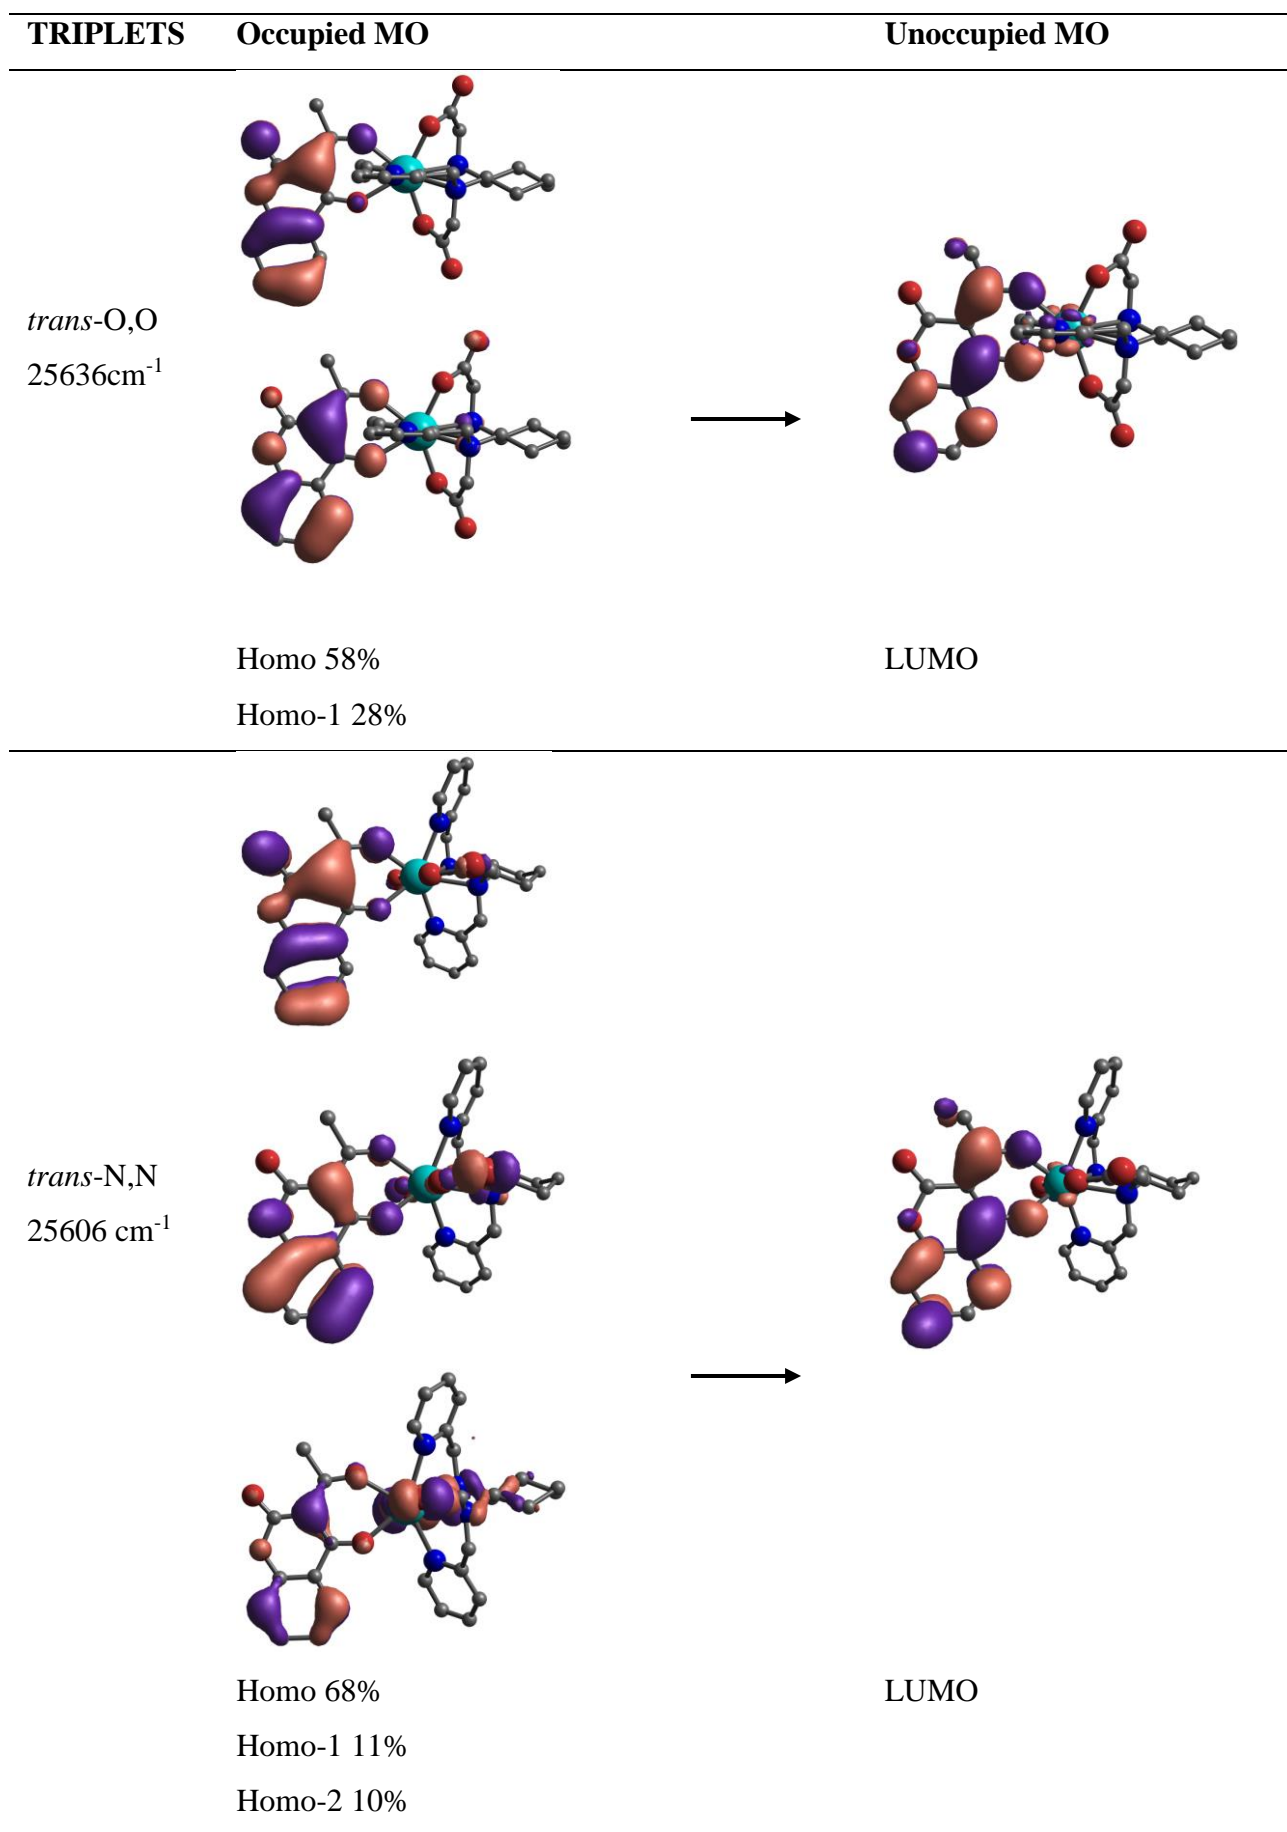

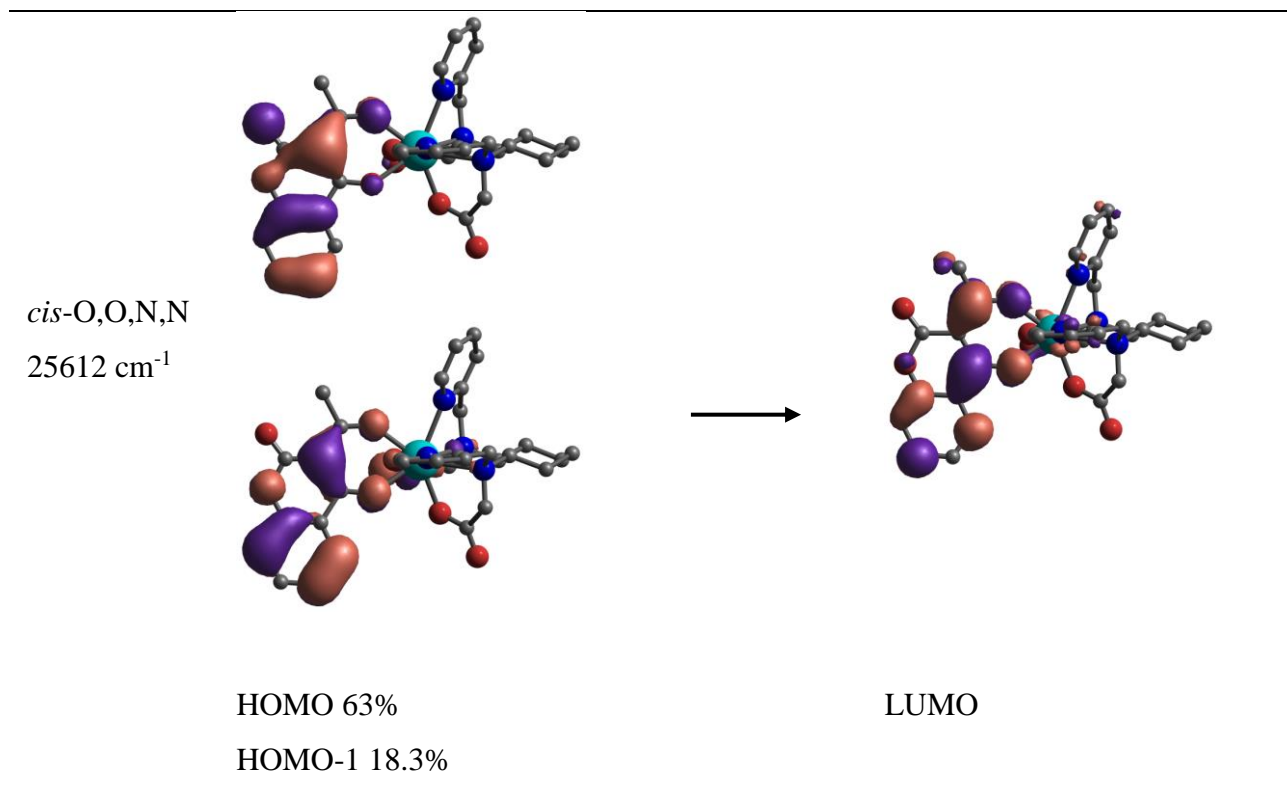

**Figure S8.** Kohn–Sham molecular orbitals composition of S<sub>1</sub> and T<sub>1</sub> states for [Y(bpcd)(tta)]. H atoms are omitted for clarity.

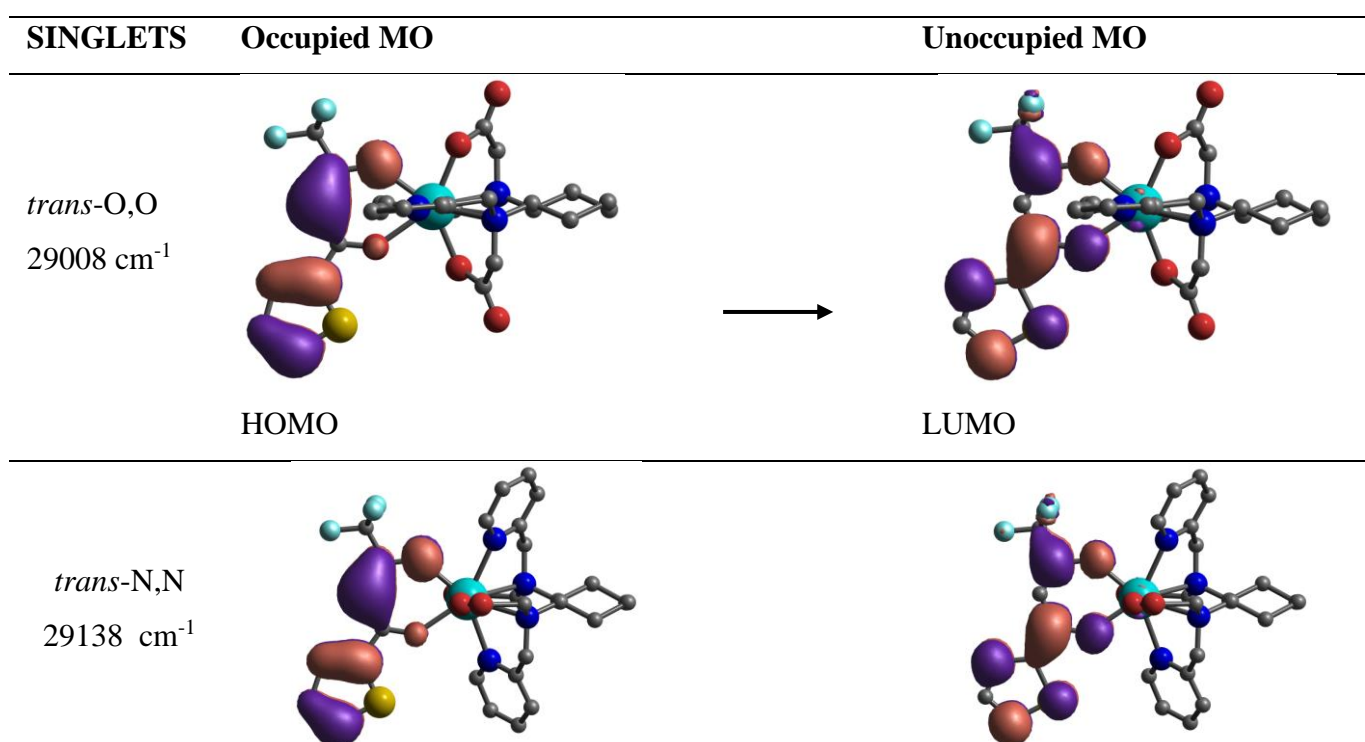

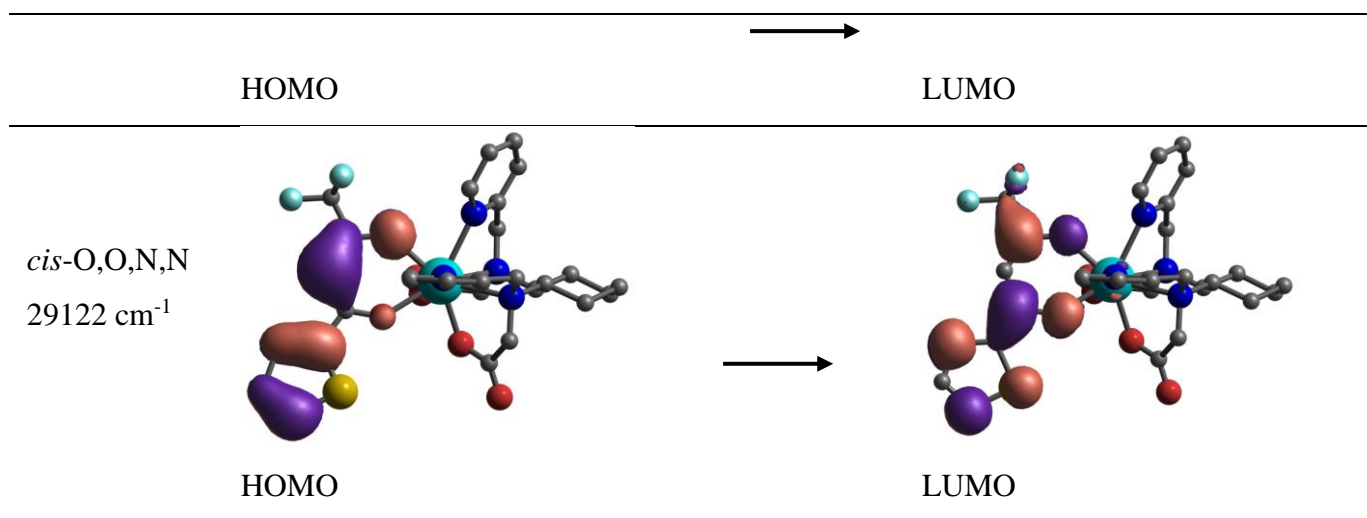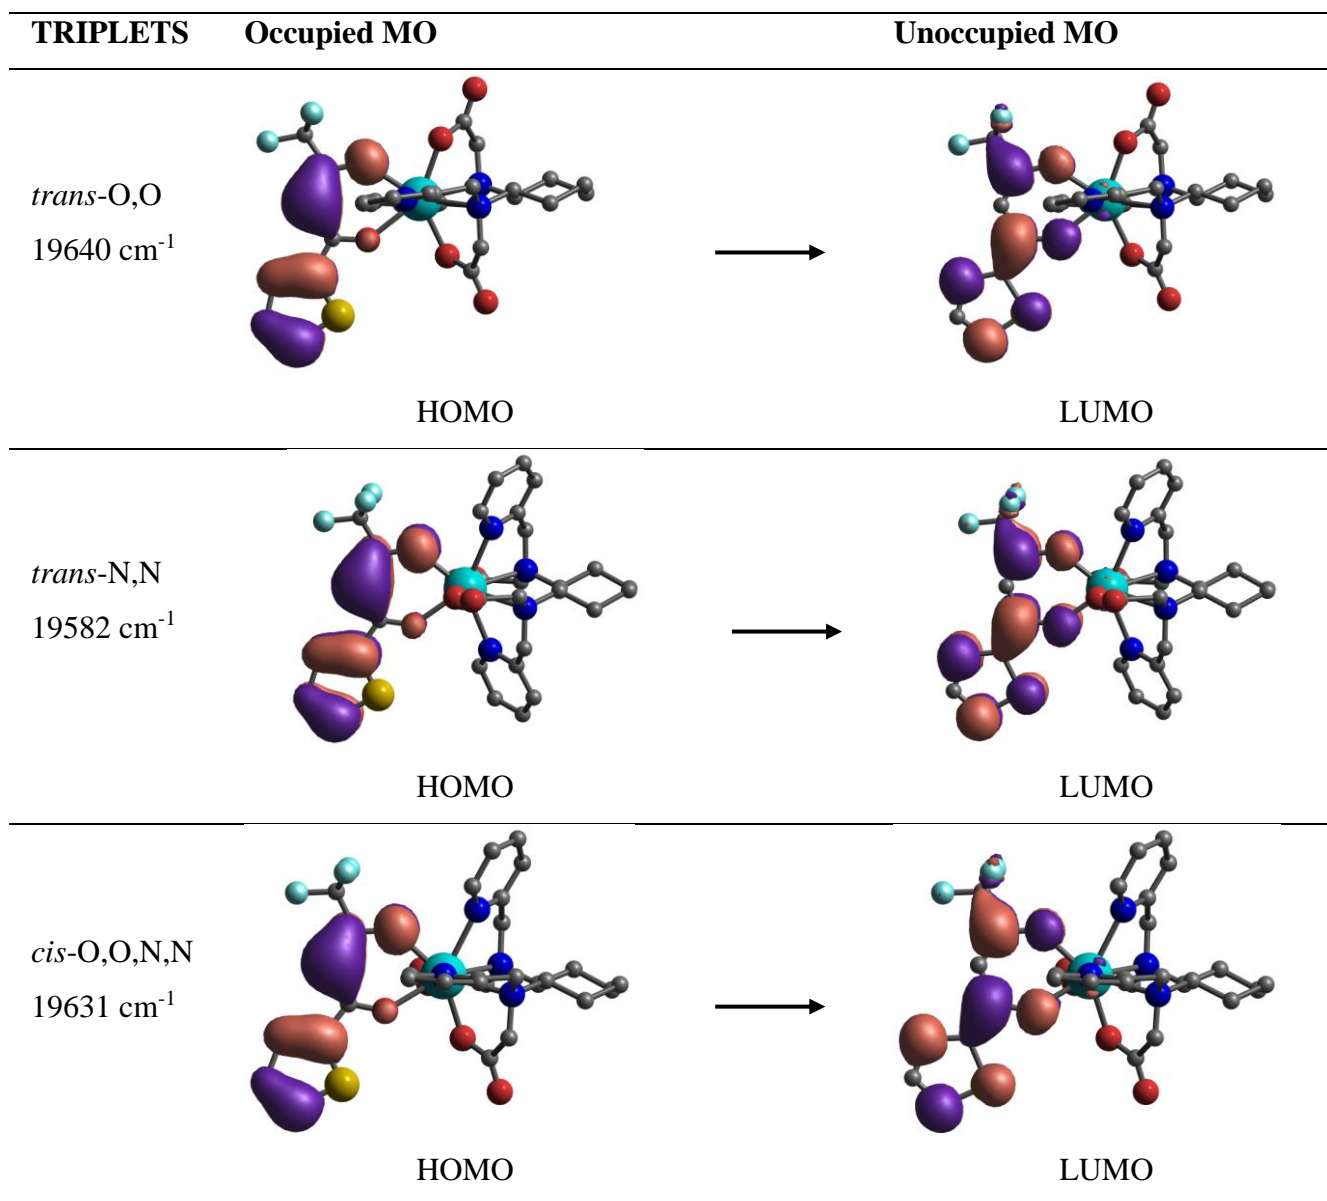

**Figure S9.** Kohn–Sham molecular orbitals composition of  $S_1$  and  $T_1$  states for  $[\text{La}(\text{bpcd})(\text{Coum})(\text{H}_2\text{O})_n]$ . Hydrogen atoms are omitted for clarity.

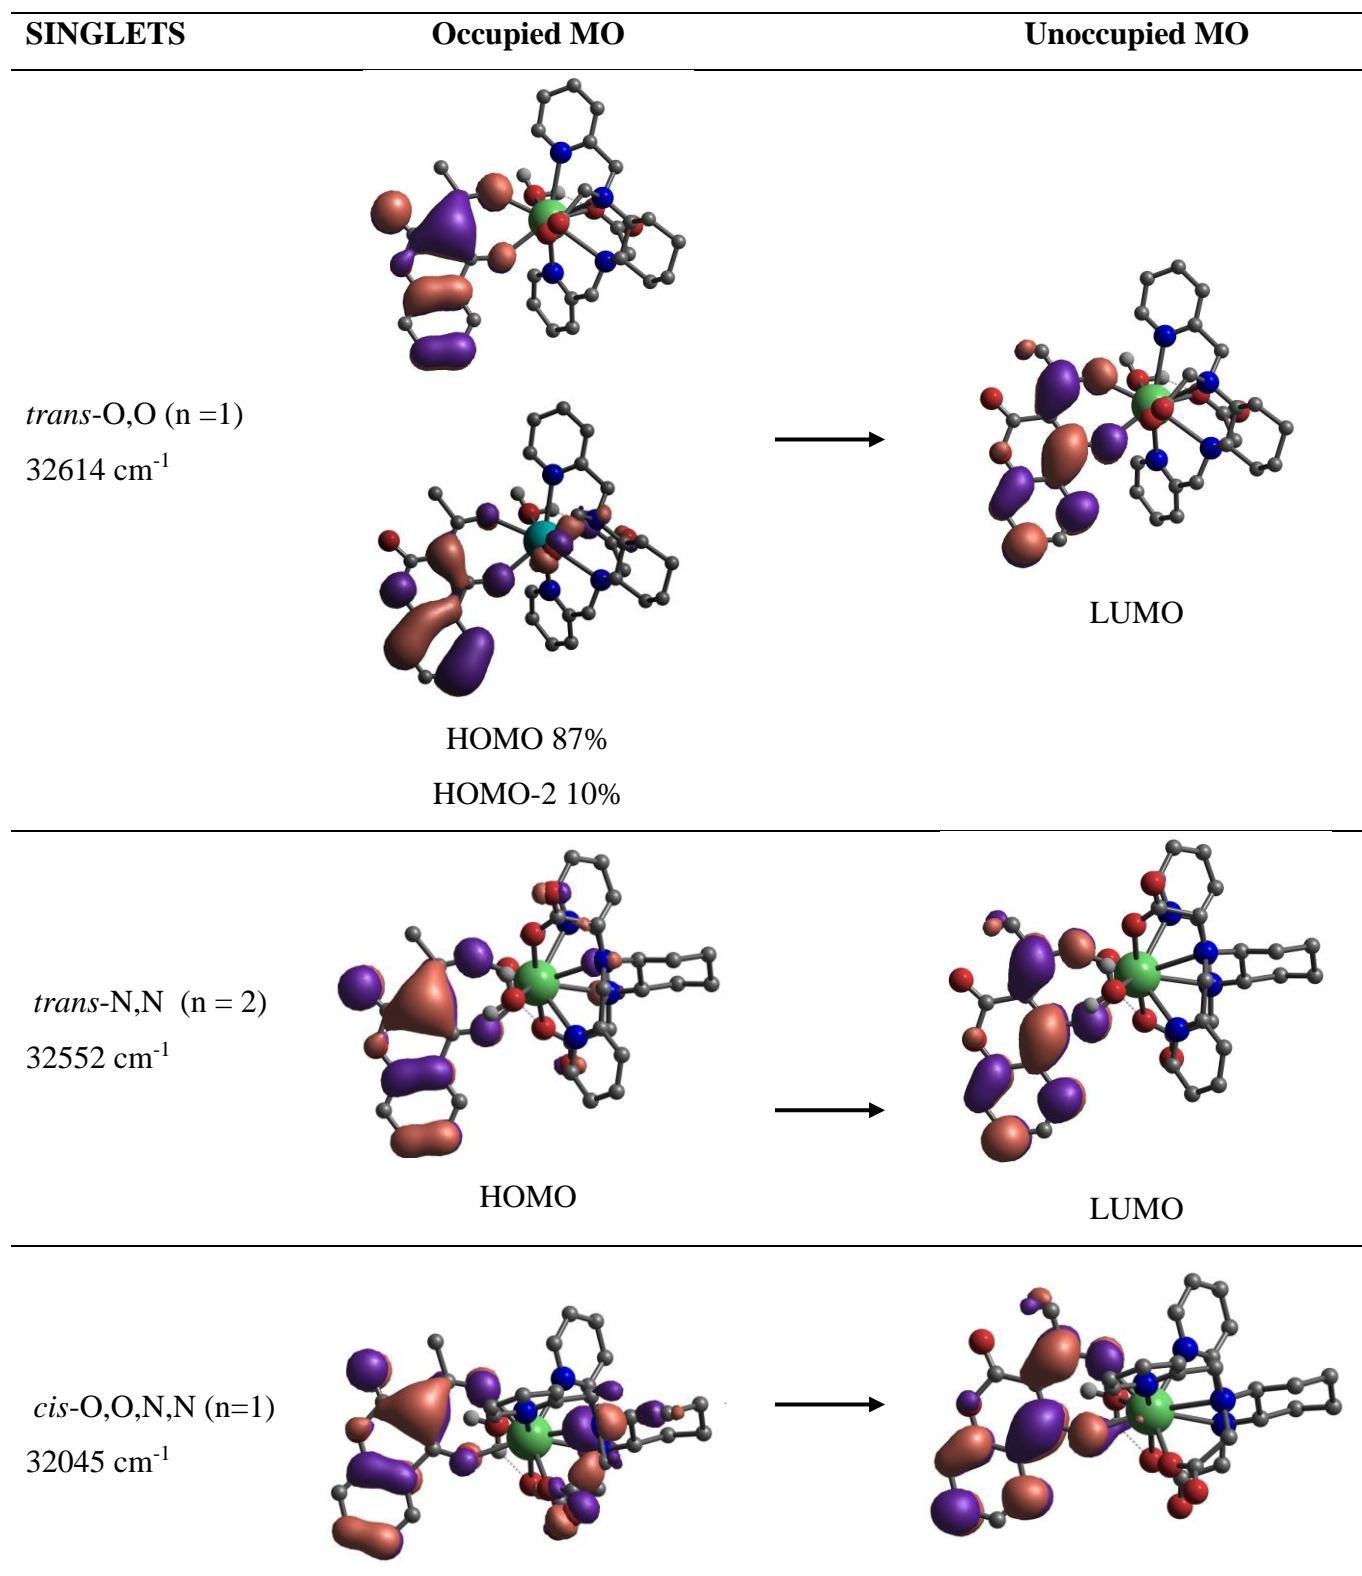

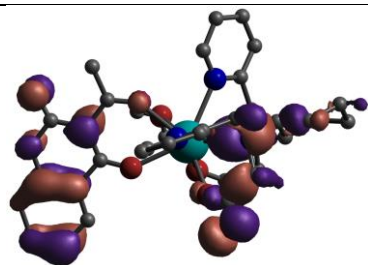

HOMO 65%

HOMO-1 27%

---

**TRIPLETS**

**Occupied MO**

**Unoccupied MO**

---

*trans*-O,O (n =1)  
26033 cm<sup>-1</sup>

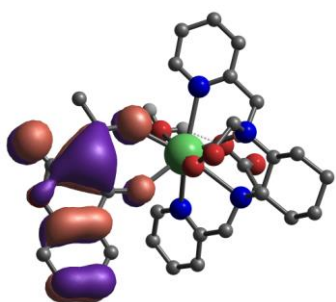

HOMO

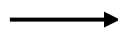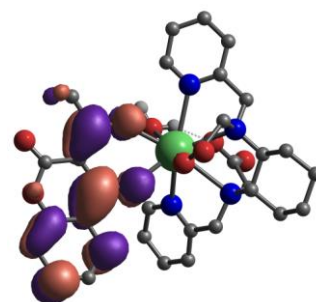

LUMO

---

*trans*-N,N(n =2)  
25882cm<sup>-1</sup>

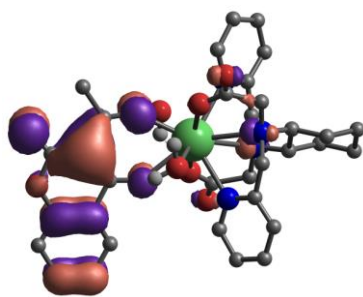

HOMO

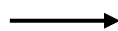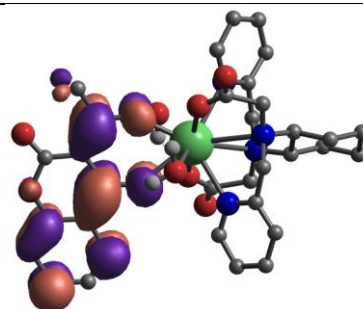

LUMO

---

*cis*-O,O,N,N(n =1)  
25632 cm<sup>-1</sup>

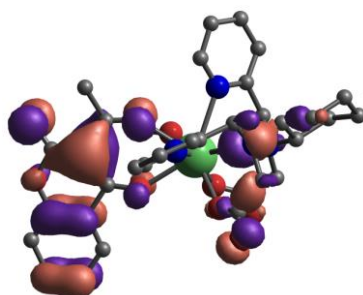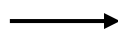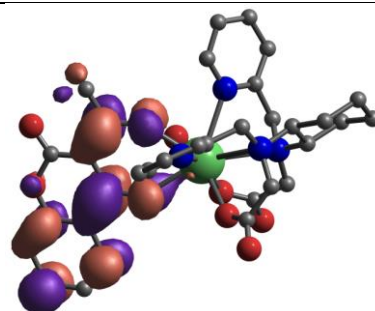

**Figure S10.** Kohn–Sham molecular orbitals composition of  $S_1$  and  $T_1$  states for  $[\text{La}(\text{bpcd})(\text{tta})(\text{H}_2\text{O})_n]$ . Hydrogen atoms are omitted for clarity.

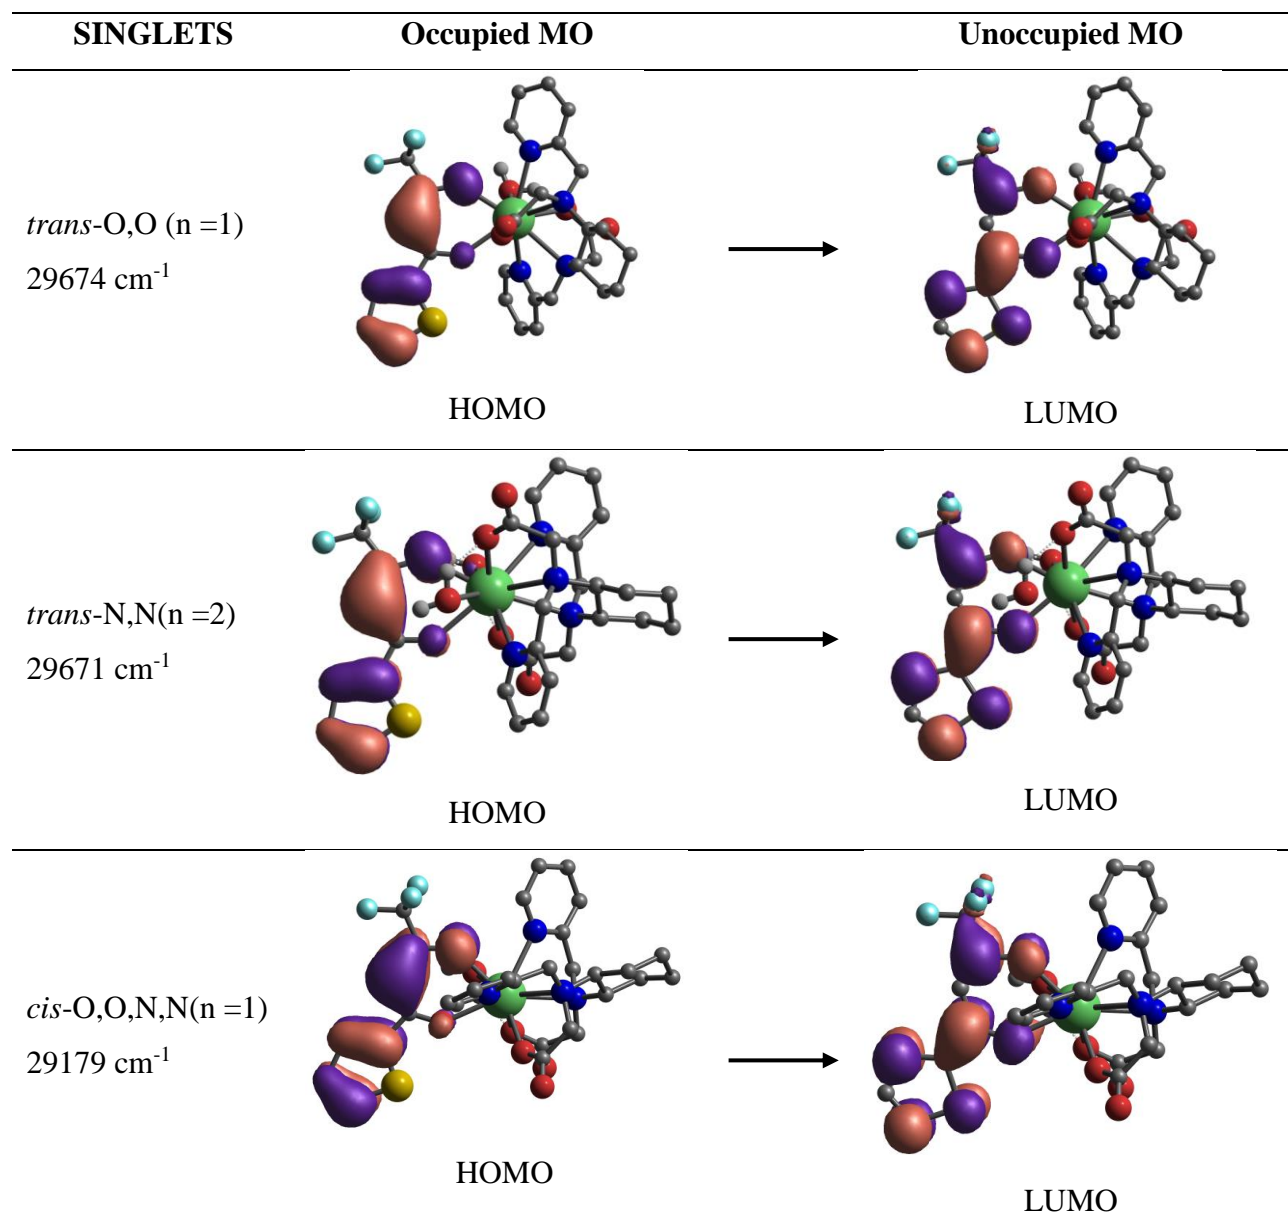

---

**TRIPLETS**

---

**Occupied MO****Unoccupied MO**

---

*trans*-O,O (n = 1)  
20007 cm<sup>-1</sup>

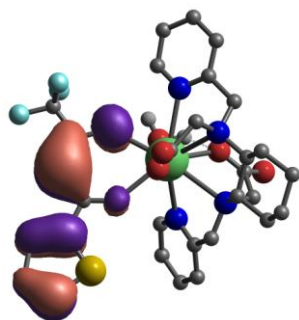

HOMO

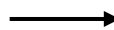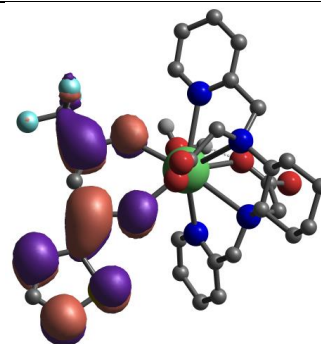

LUMO

---

*trans*-N,N (n = 2)  
20026 cm<sup>-1</sup>

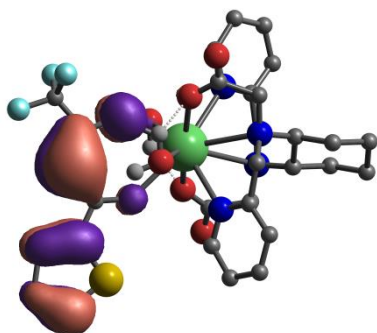

HOMO

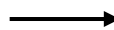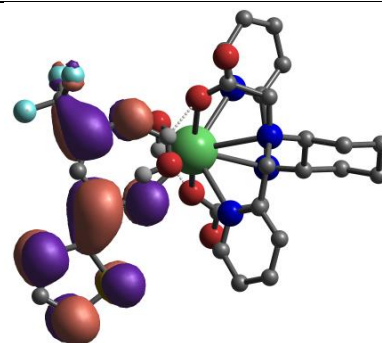

LUMO

---

*cis*-O,O,N,N (n = 1)  
19512 cm<sup>-1</sup>

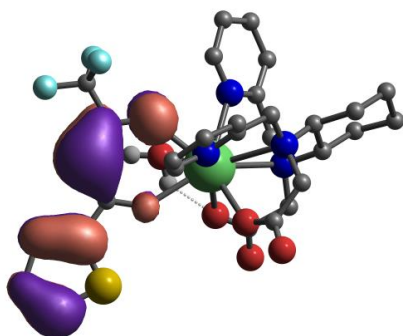

HOMO

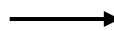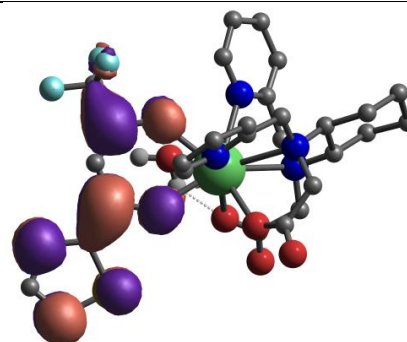

LUMO

---

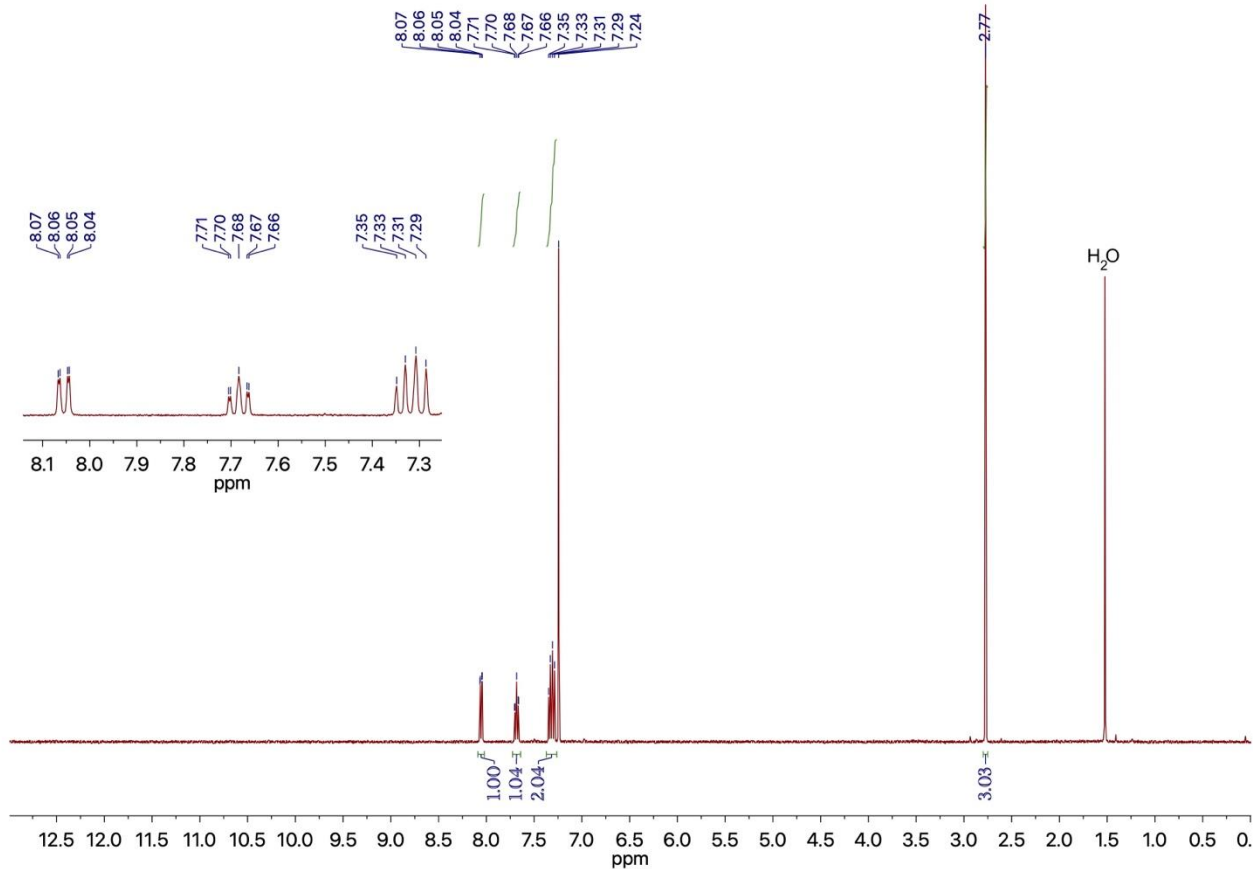

**Figure S11.**  $^1\text{H-NMR}$  (400 MHz,  $\text{CDCl}_3$ ) spectrum of 3-acetyl-4-hydroxy-2H-chromen-2-one.



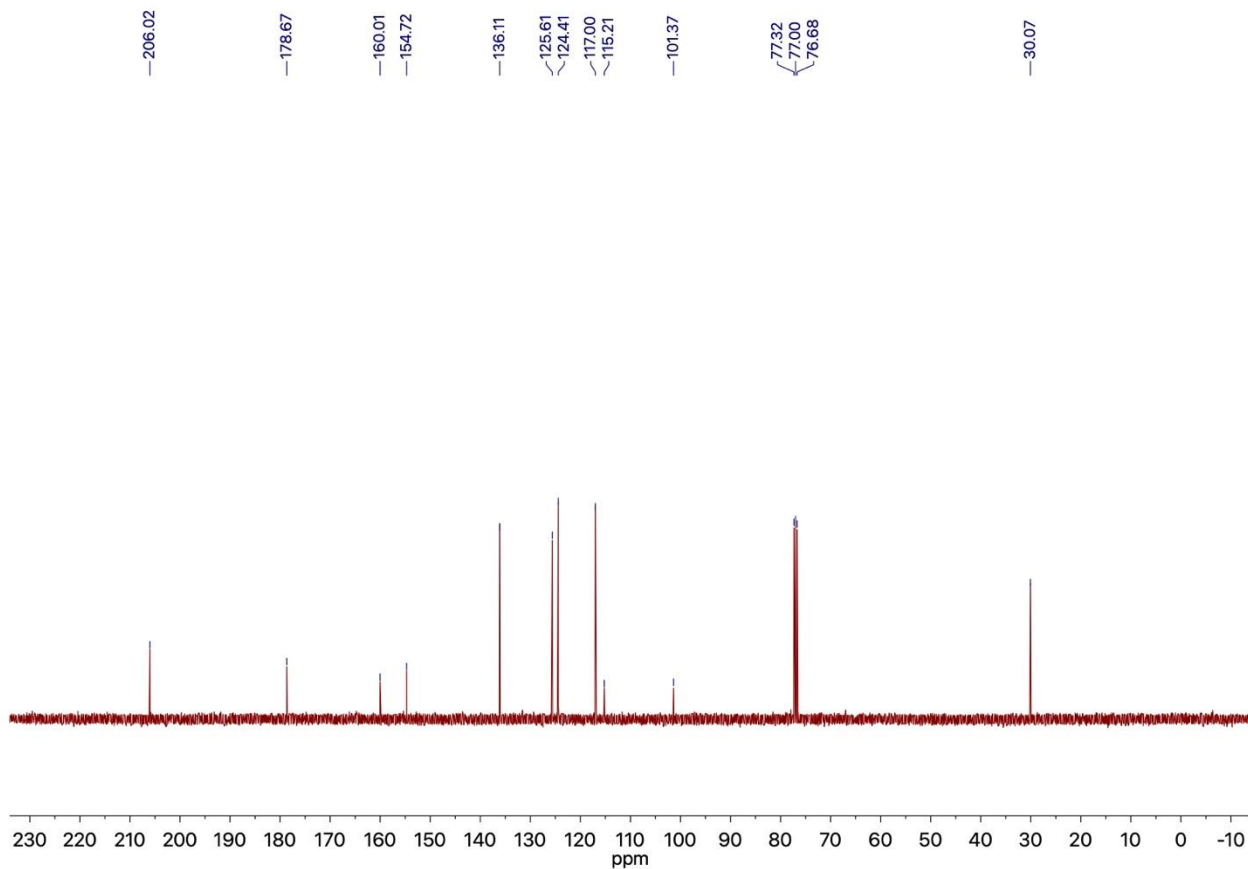

**Figure S12.**  $^{13}\text{C}$ -NMR (100 MHz,  $\text{CDCl}_3$ ) spectrum of 3-acetyl-4-hydroxy-2H-chromen-2-one.

### References

[S1] L. Arrico, L. Di Bari, F. Zinna. Quantifying the Overall Efficiency of Circularly Polarized Emitters. *Chem. Eur. J.* **2021**, 27(9), 2920.
